# Supplementary material for: Optimized gadolinium-DO3A loading in RAFT-polymerized copolymers for superior MR imaging of aging blood–brain barrier
Source: Royal Society of Chemistry journal article supplement (doi:10.1039/d4sd00063c), 2024-01-01
Supplement: d4sd00063c1.pdf [file d4sd00063c1.pdf]

## Supplementary Information

### Optimized Gadolinium-DO3A loading in RAFT-Polymerized Copolymers for Superior MR Imaging of aging blood-brain barrier

Hunter A. Miller<sup>ae</sup>, Aaron Priester<sup>bc</sup>, Evan T. Curtis<sup>a</sup>, Krista Hilmas<sup>c</sup>, Ashleigh Abbott<sup>d</sup>, Forrest M. Kievit<sup>a</sup>, Anthony J. Convertine<sup>b</sup>

<sup>a</sup>Department of Biological Systems Engineering, University of Nebraska-Lincoln, 262 Morrison Center, Lincoln, NE 68583, USA.

<sup>b</sup>Department of Materials Science and Engineering, Missouri University of Science and Technology, 1400 North Bishop Avenue, Rolla, MO 65409, USA.

<sup>c</sup>Joint Department of Biomedical Engineering, North Carolina State University and The University of North Carolina at Chapel Hill, Raleigh, NC, 27695, USA.

<sup>d</sup>J. Crayton Pruitt Family Department of Biomedical Engineering, University of Florida- Gainesville, 1275 Center Drive, Gainesville, FL, 32611, USA.

<sup>e</sup> Equally contributing co-first authors

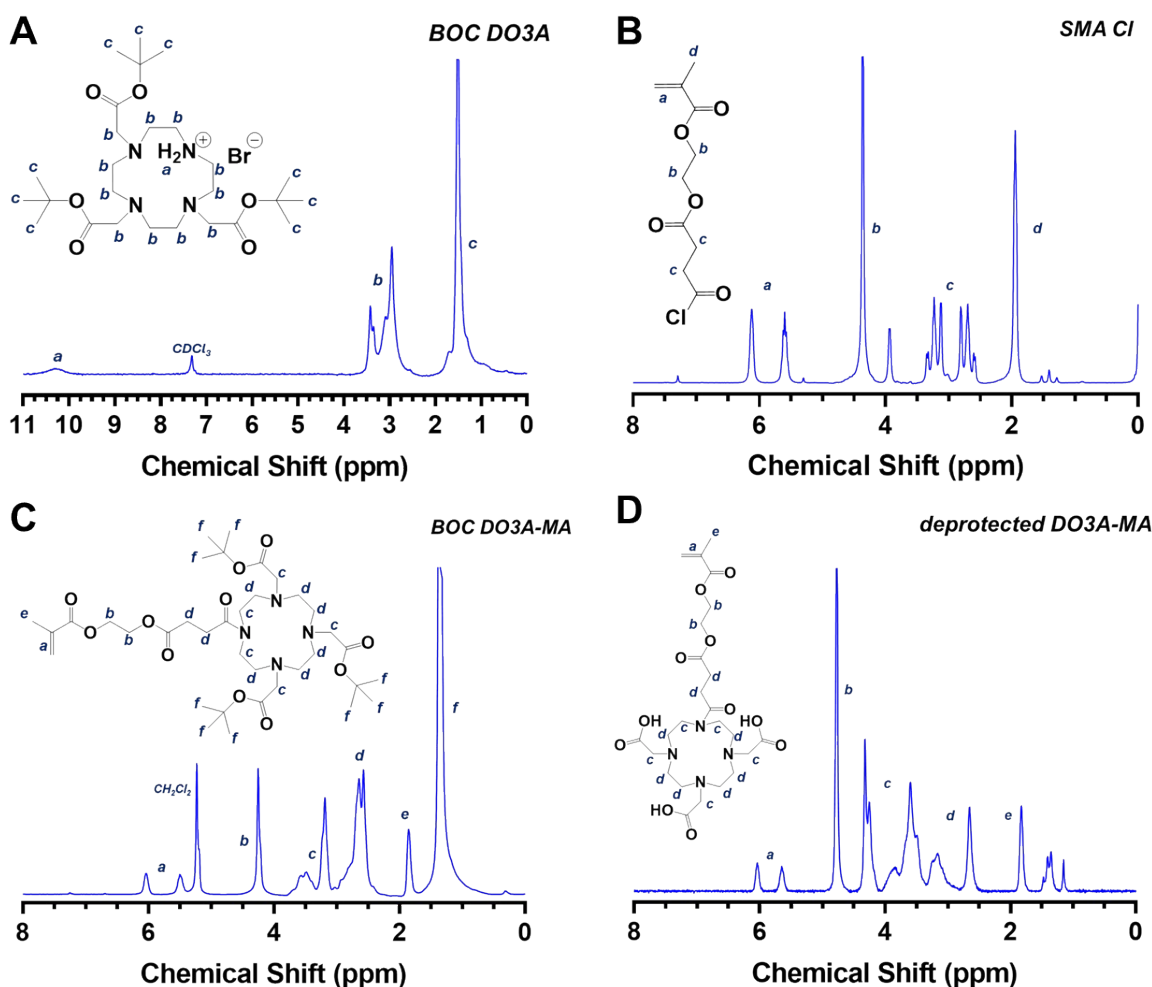

**ESI Figure 1.** <sup>1</sup>H NMR spectra for each step of the DO3A-MA monomer synthesis process. (A) <sup>1</sup>H NMR of BOC DO3A precursor powder synthesized *via* trialkylation of cyclen by *tert*-butyl bromoacetate. (B) <sup>1</sup>H NMR of SMA acid chloride monomer synthesis *via* reaction between SMA and oxalyl chloride. (C) BOC DO3A-MA monomer synthesis *via* reaction of SMA Cl (B) and “tri-boc” precursor (A). (D) Deprotection step of BOC DO3A-MA monomer *via* reaction with TFA (trifluoroacetic acid) for removal of boc groups to make DO3A-MA monomer.

Peptides were synthesized automatically by using standard Fmoc chemistry as described previously by:

Zwanziger, D., Hackel, D., Staat, C., Böcker, A., Brack, A., Beyermann, M., Rittner, H., & Blasig, I. E. (2012). A peptidomimetic tight junction modulator to improve regional analgesia. *Molecular Pharmaceutics*, 9(6), 1785-1794. <https://doi.org/10.1021/mp3000937>

The N-terminus was then functionalized with the carboxylic acid-functional monomer SMA as shown below.

“Monomer”- SSVSQSTGQIQSKVDSLNLNSTQATR-conh<sub>2</sub>

Where Monomer is the acid below connected to the N-terminal of the peptide by amide bond

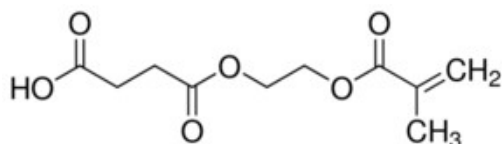

Monomer

**Sample processing and Analytical Methods:** Sample was resuspended at 1mg/mL in 60% acetonitrile and diluted 10x with 70% acetonitrile, 0.1% formic acid. A static nanospray emitter (Econo12) was filled with 10uL of sample and data acquired by FTMS positive ion on an LTQ Orbitrap XL. The sample was loaded into a static nanospray ECONO 12 tip (Proxeon) and analyzed by nano-electrospray ionization in positive-ion mode on a ThermoScientific LTQ Orbitrap XL mass spectrometer. Typical flow rates from these tips are estimated to be 50nL/min. FTMS data were collected in the Orbitrap (100,000 resolving power, 500-2000 m/z, 1 microscan, maximum inject time of 100ms, AGC= 5e5) over 1 min of infusion. FTMS spectra were internally calibrated using a lock mass of 531.40777 m/z (didodecyl 3,3'-thiodipropionate oxidized to sulfoxide), a common background ion.

T81-3f2 #1-39 RT: 0.02-1.04 AV: 39 NL: 1.11E7  
T: FTMS + p NSIFull.ms [500.00-2000.00]

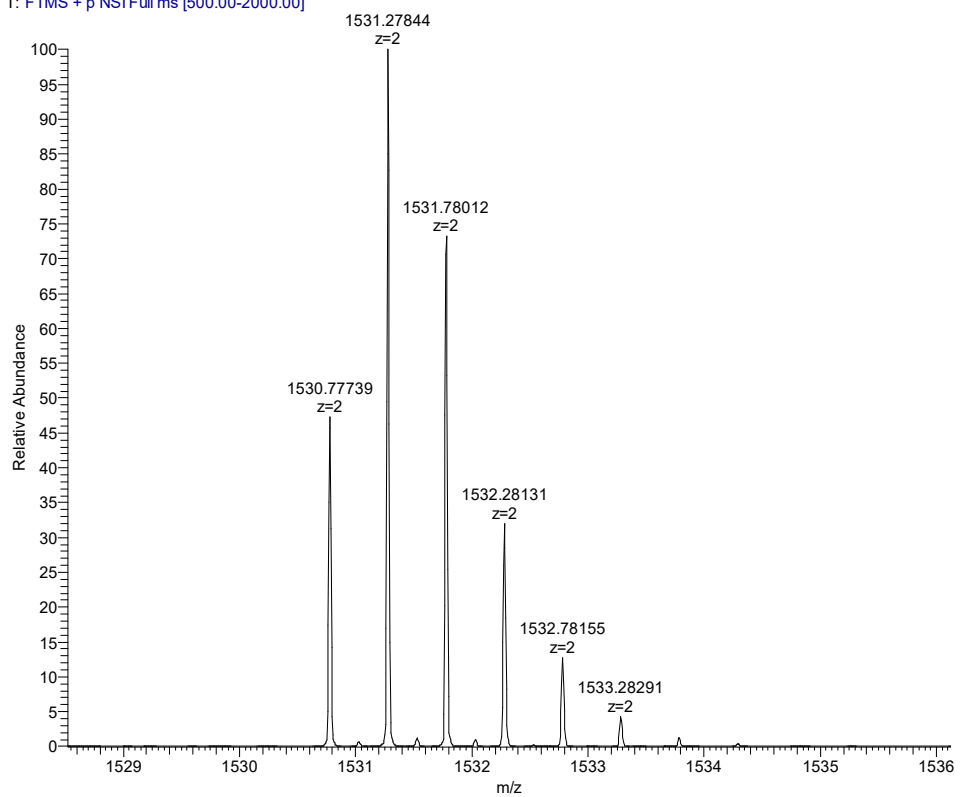

Theoretical  $m/z$   $[M+2H]^+ = 1530.77583$

Observed  $m/z$  (monoisotopic peak) = 1530.77739

Mass error = 1.02 ppm

**ESI Figure 2.** Mass Spectroscopy (MS) of C1C2 peptide monomer.

T81-3f2\_XT\_00001\_M\_#1 RT: 1.00 AV: 1 NL: 9.74E6  
T: FTMS + p NSI Full ms [500.00-2000.00]

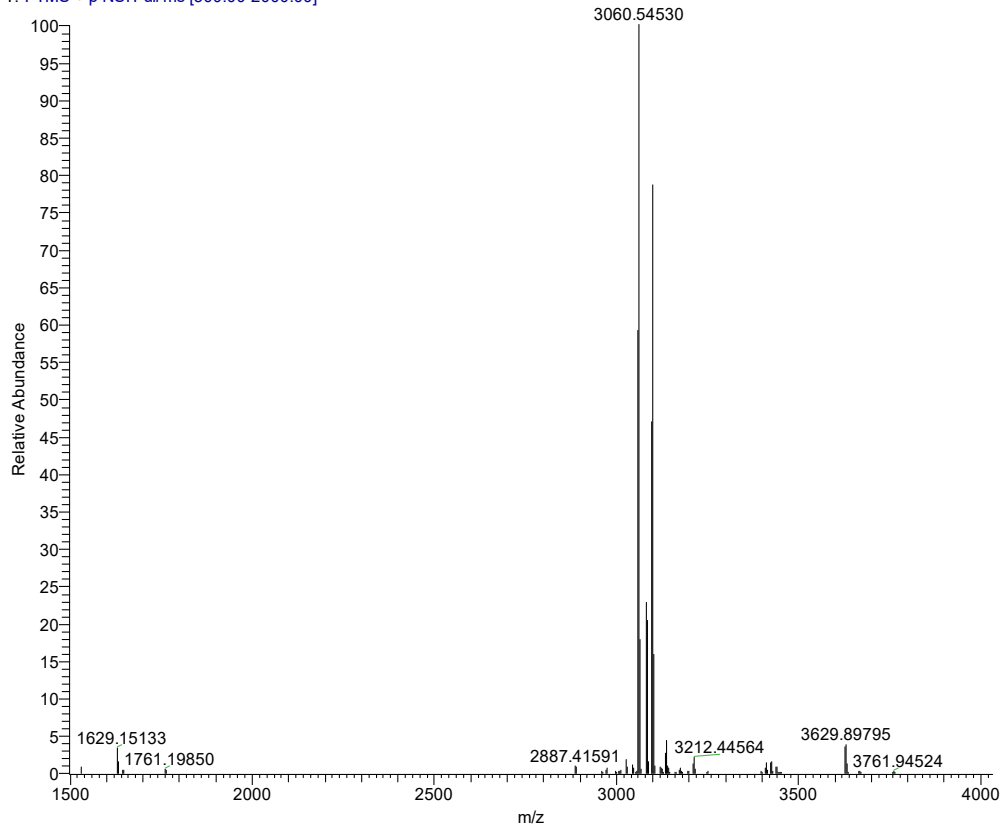

**ESI Figure 3.** Mass Spectrometry (MS) of C1C2 peptide monomer

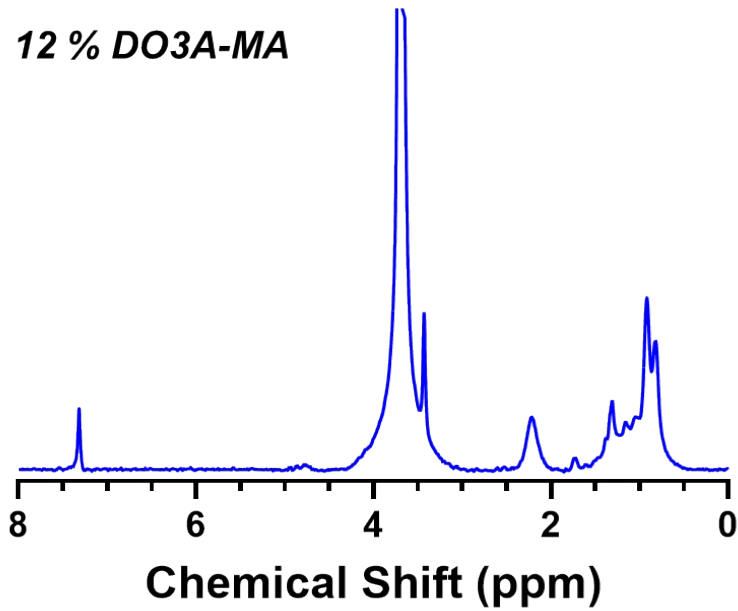

**ESI Figure 4.** Representative  $^1\text{H}$  NMR spectrum of a (DO3A-MA)-co-O950 series polymer using the 12% DO3A-MA polymer.

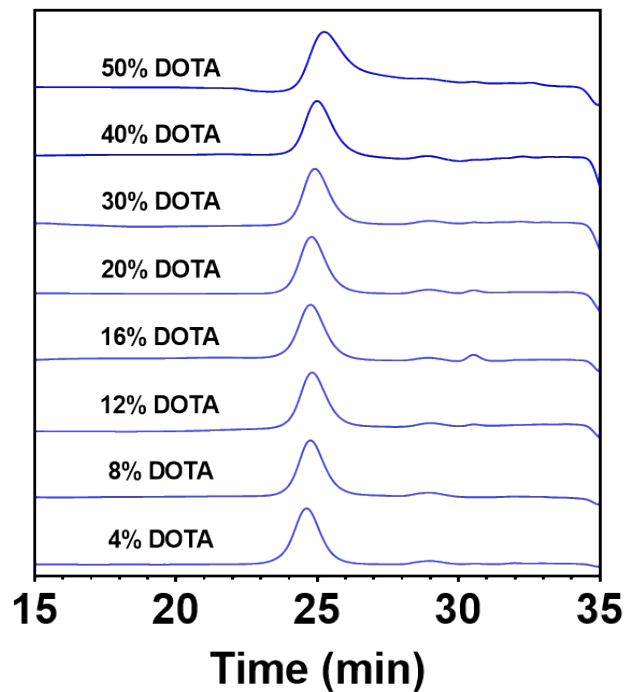

**ESI Figure 5.** Gel Permeation Chromatography (GPC) traces for (DO3A-MA)-co-O950 series polymers for MRI contrast testing. The shift in retention time is subtle from 4% DOTA to 50% DOTA due to the similar targeted DPs and the log scale of molecular weight associated with GPC measurements. As shown, all molar mass distributions were unimodal and narrow (50% being the one exception).
